# Supplementary material
Source: PubMed Central journal article supplement (PMC3614136)
Supplement: 11606_2012_2220_MOESM1_ESM.pdf [file 11606_2012_2220_MOESM1_ESM.pdf]

## ONLINE APPENDIX

Thacker EL, McKnight B, Psaty BM, et al. Association of body mass index, diabetes, hypertension, and blood pressure levels with risk of permanent atrial fibrillation

**eTable 1.** Baseline characteristics of Group Health enrollees followed for recurrent AF

**eTable 2.** Distributions of survival times by BMI categories and outcome status

**eTable 3.** Hazard ratios of permanent AF for different definitions of permanent AF

**eTable 4.** Hazard ratios of recurrent AF

**eFigure 1.** Examples of participant timelines showing recurrent and permanent AF outcomes

**eTable 1. Baseline characteristics of Group Health enrollees followed for recurrent AF**

| <b>Characteristic*</b>                                      | <b>N = 1,517</b> |
|-------------------------------------------------------------|------------------|
| <i>Demographic characteristics</i>                          |                  |
| Age, y, mean (SD)                                           | 69.4 (11.1)      |
| Male, N (%)                                                 | 788 (51.9)       |
| White race, N (%)                                           | 1,399 (92.5)     |
| Group Health enrollment, y, mean (SD)                       | 21.7 (13.5)      |
| <i>Location of initial AF diagnosis</i>                     |                  |
| Outpatient, N (%)                                           | 483 (32.2)       |
| Urgent care, N (%)                                          | 165 (11.0)       |
| Emergency department, N (%)                                 | 610 (40.7)       |
| Inpatient, N (%)                                            | 217 (14.5)       |
| Other, N (%)                                                | 23 (1.5)         |
| <i>Most severe symptom present at initial AF diagnosis†</i> |                  |
| Loss of consciousness, N (%)                                | 33 (2.3)         |
| Heart failure, N (%)                                        | 124 (8.8)        |
| Chest pain, N (%)                                           | 304 (21.5)       |
| Shortness of breath, N (%)                                  | 240 (17.0)       |
| Mental status change, N (%)                                 | 19 (1.3)         |
| Dizziness, N (%)                                            | 126 (8.9)        |
| Palpitations, N (%)                                         | 289 (20.5)       |
| Other, N (%)                                                | 74 (5.2)         |
| No symptoms, N (%)                                          | 204 (14.4)       |
| <i>Clinical characteristics</i>                             |                  |
| Body weight, kg, mean (SD)                                  | 87.5 (22.5)      |
| Height, cm, mean (SD)                                       | 171.4 (10.2)     |
| Body mass index, kg/m <sup>2</sup> , mean (SD)              | 29.7 (7.1)       |
| 18.5 – 24.9 (normal), N (%)                                 | 387 (25.5)       |
| 25.0 – 29.9 (overweight), N (%)                             | 547 (36.1)       |
| 30.0 – 34.9 (obese 1), N (%)                                | 319 (21.0)       |
| 35.0 – 39.9 (obese 2), N (%)                                | 135 (8.9)        |
| ≥ 40.0 (obese 3), N (%)                                     | 129 (8.5)        |
| Diabetes, N (%)                                             | 237 (15.6)       |
| Hypertension, N (%)                                         | 811 (53.5)       |
| Systolic blood pressure, mm Hg, mean (SD)                   | 136.0 (20.7)     |
| Diastolic blood pressure, mm Hg, mean (SD)                  | 76.4 (11.6)      |
| Coronary heart disease, N (%)                               | 319 (21.0)       |
| Valvular heart disease, N (%)                               | 85 (5.6)         |
| Heart failure, N (%)                                        | 111 (7.3)        |
| Prior stroke, N (%)                                         | 105 (6.9)        |

\* Five participants had missing values for race, six for years of Group Health enrollment, 19 for location of initial AF diagnosis, and 104 for symptoms present at initial AF diagnosis.

† Symptoms are listed in order of severity, with loss of consciousness as most severe.

**eTable 2. Distributions of survival times by BMI categories and outcome status\***

| Body mass index (kg/m <sup>2</sup> ) | Participants with permanent AF |                          |                  |                  | Censored participants† |                          |                  |                  |
|--------------------------------------|--------------------------------|--------------------------|------------------|------------------|------------------------|--------------------------|------------------|------------------|
|                                      | n                              | Survival time percentile |                  |                  | n                      | Survival time percentile |                  |                  |
|                                      |                                | 25 <sup>th</sup>         | 50 <sup>th</sup> | 75 <sup>th</sup> |                        | 25 <sup>th</sup>         | 50 <sup>th</sup> | 75 <sup>th</sup> |
| 18.5 – 24.9 (normal)                 | 65                             | 0.5                      | 1.5              | 2.6              | 276                    | 1.9                      | 4.7              | 5.9              |
| 25.0 – 29.9 (overweight)             | 114                            | 0.3                      | 1.5              | 2.6              | 383                    | 2.8                      | 5.0              | 6.4              |
| 30.0 – 34.9 (obese 1)                | 43                             | 0.4                      | 1.9              | 3.4              | 224                    | 3.0                      | 5.1              | 6.4              |
| 35.0 – 39.9 (obese 2)                | 33                             | 0.3                      | 1.4              | 2.5              | 95                     | 4.0                      | 5.2              | 6.4              |
| ≥ 40.0 (obese 3)                     | 31                             | 0.3                      | 1.3              | 3.3              | 90                     | 2.3                      | 4.8              | 6.2              |
| Overall                              | 317                            | 0.4                      | 1.5              | 2.7              | 1068                   | 2.6                      | 5.0              | 6.2              |

  

| Body mass index (kg/m <sup>2</sup> ) | Participants with recurrent AF |                          |                  |                  | Censored participants‡ |                          |                  |                  |
|--------------------------------------|--------------------------------|--------------------------|------------------|------------------|------------------------|--------------------------|------------------|------------------|
|                                      | n                              | Survival time percentile |                  |                  | n                      | Survival time percentile |                  |                  |
|                                      |                                | 25 <sup>th</sup>         | 50 <sup>th</sup> | 75 <sup>th</sup> |                        | 25 <sup>th</sup>         | 50 <sup>th</sup> | 75 <sup>th</sup> |
| 18.5 – 24.9 (normal)                 | 245                            | 0.04                     | 0.2              | 0.9              | 142                    | 0.6                      | 3.2              | 6.1              |
| 25.0 – 29.9 (overweight)             | 376                            | 0.06                     | 0.3              | 1.1              | 171                    | 1.3                      | 5.0              | 6.6              |
| 30.0 – 34.9 (obese 1)                | 215                            | 0.05                     | 0.3              | 1.3              | 104                    | 1.9                      | 5.2              | 6.7              |
| 35.0 – 39.9 (obese 2)                | 97                             | 0.04                     | 0.2              | 1.0              | 38                     | 2.7                      | 5.2              | 6.3              |
| ≥ 40.0 (obese 3)                     | 91                             | 0.09                     | 0.3              | 1.0              | 38                     | 3.6                      | 5.7              | 6.9              |
| Overall                              | 1,024                          | 0.05                     | 0.3              | 1.1              | 493                    | 1.3                      | 5.0              | 6.5              |

\* Survival times are given in years.

† For permanent AF, censored participants reached the end of follow-up, disenrolled from Group Health, had an AF ablation or maze procedure, or died.

‡ For recurrent AF, censored participants reached the end of follow-up, disenrolled from Group Health, or died.

**eTable 3. Hazard ratios of permanent AF for different definitions of permanent AF\***

| Risk factor                                                                                                                                                | Events | Person-years | Model 3†<br>HR (95% CI) |
|------------------------------------------------------------------------------------------------------------------------------------------------------------|--------|--------------|-------------------------|
| <i>Permanent AF definition: AF present on four separate occasions with the first and fourth occasions 6-36 months apart and no documented sinus rhythm</i> |        |              |                         |
| Overall                                                                                                                                                    | 188    | 5,694        | —                       |
| Age, per 10 y                                                                                                                                              | —      | —            | 1.34 (1.14, 1.57)       |
| Female                                                                                                                                                     | 90     | 2,791        | 1.00 (reference)        |
| Male                                                                                                                                                       | 98     | 2,903        | 1.19 (0.88, 1.61)       |
| Body mass index, (kg/m <sup>2</sup> )‡                                                                                                                     |        |              |                         |
| 18.5 – 24.9 (normal)                                                                                                                                       | 33     | 1,329        | 1.00 (reference)        |
| 25.0 – 29.9 (overweight)                                                                                                                                   | 70     | 2,054        | 1.54 (1.01, 2.35)       |
| 30.0 – 34.9 (obese 1)                                                                                                                                      | 41     | 1,292        | 1.50 (0.94, 2.41)       |
| 35.0 – 39.9 (obese 2)                                                                                                                                      | 20     | 562          | 1.89 (1.06, 3.40)       |
| ≥ 40.0 (obese 3)                                                                                                                                           | 24     | 457          | 3.12 (1.76, 5.53)       |
| Diabetes:                                                                                                                                                  |        |              |                         |
| No                                                                                                                                                         | 160    | 4,863        | 1.00 (reference)        |
| Yes                                                                                                                                                        | 28     | 831          | 1.00 (0.65, 1.53)       |
| Hypertension:                                                                                                                                              |        |              |                         |
| No                                                                                                                                                         | 87     | 2,768        | 1.00 (reference)        |
| Yes                                                                                                                                                        | 101    | 2,926        | 0.96 (0.71, 1.32)       |
| Systolic blood pressure, per 10 mm Hg                                                                                                                      | —      | —            | 0.92 (0.84, 1.01)       |
| Diastolic blood pressure, per 10 mm Hg                                                                                                                     | —      | —            | 1.10 (0.93, 1.29)       |
| <i>Permanent AF definition: AF present on two separate occasions 12-36 months apart without any documented sinus rhythm</i>                                |        |              |                         |
| Overall                                                                                                                                                    | 249    | 4,853        | —                       |
| Age, per 10 y                                                                                                                                              | —      | —            | 1.34 (1.16, 1.54)       |
| Female                                                                                                                                                     | 128    | 2,361        | 1.00 (reference)        |
| Male                                                                                                                                                       | 121    | 2,492        | 1.02 (0.79, 1.33)       |
| Body mass index, (kg/m <sup>2</sup> )§                                                                                                                     |        |              |                         |
| 18.5 – 24.9 (normal)                                                                                                                                       | 47     | 1,132        | 1.00 (reference)        |
| 25.0 – 29.9 (overweight)                                                                                                                                   | 92     | 1,750        | 1.41 (0.98, 2.02)       |
| 30.0 – 34.9 (obese 1)                                                                                                                                      | 55     | 1,094        | 1.38 (0.93, 2.07)       |
| 35.0 – 39.9 (obese 2)                                                                                                                                      | 28     | 483          | 1.73 (1.06, 2.83)       |
| ≥ 40.0 (obese 3)                                                                                                                                           | 27     | 394          | 2.24 (1.35, 3.74)       |
| Diabetes:                                                                                                                                                  |        |              |                         |
| No                                                                                                                                                         | 213    | 4,140        | 1.00 (reference)        |
| Yes                                                                                                                                                        | 36     | 713          | 1.00 (0.68, 1.45)       |
| Hypertension:                                                                                                                                              |        |              |                         |
| No                                                                                                                                                         | 113    | 2,379        | 1.00 (reference)        |
| Yes                                                                                                                                                        | 136    | 2,474        | 0.96 (0.73, 1.25)       |
| Systolic blood pressure, per 10 mm Hg                                                                                                                      | —      | —            | 0.98 (0.91, 1.05)       |
| Diastolic blood pressure, per 10 mm Hg                                                                                                                     | —      | —            | 1.08 (0.95, 1.24)       |

| <b>Risk factor</b>                                                                                                         | <b>Events</b> | <b>Person-years</b> | <b>Model 3†<br/>HR (95% CI)</b> |
|----------------------------------------------------------------------------------------------------------------------------|---------------|---------------------|---------------------------------|
| Hg                                                                                                                         |               |                     |                                 |
| <i>Permanent AF definition: AF present on two separate occasions 6-18 months apart without any documented sinus rhythm</i> |               |                     |                                 |
| Overall                                                                                                                    | 266           | 5,492               | —                               |
| Age, per 10 y                                                                                                              | —             | —                   | 1.27 (1.11, 1.46)               |
| Female                                                                                                                     | 140           | 2,660               | 1.00 (reference)                |
| Male                                                                                                                       | 126           | 2,832               | 0.95 (0.73, 1.22)               |
| Body mass index, (kg/m <sup>2</sup> )‡                                                                                     |               |                     |                                 |
| 18.5 – 24.9 (normal)                                                                                                       | 58            | 1,270               | 1.00 (reference)                |
| 25.0 – 29.9 (overweight)                                                                                                   | 94            | 1,986               | 1.16 (0.83, 1.62)               |
| 30.0 – 34.9 (obese 1)                                                                                                      | 60            | 1,241               | 1.19 (0.82, 1.73)               |
| 35.0 – 39.9 (obese 2)                                                                                                      | 26            | 544                 | 1.24 (0.76, 2.01)               |
| ≥ 40.0 (obese 3)                                                                                                           | 28            | 450                 | 1.71 (1.05, 2.80)               |
| Diabetes: No                                                                                                               | 224           | 4,686               | 1.00 (reference)                |
| Yes                                                                                                                        | 42            | 806                 | 1.10 (0.77, 1.56)               |
| Hypertension: No                                                                                                           | 117           | 2,682               | 1.00 (reference)                |
| Yes                                                                                                                        | 149           | 2,810               | 1.04 (0.80, 1.36)               |
| Systolic blood pressure, per 10 mm Hg                                                                                      | —             | —                   | 0.97 (0.90, 1.04)               |
| Diastolic blood pressure, per 10 mm Hg                                                                                     | —             | —                   | 1.07 (0.94, 1.22)               |

\* The definition of permanent AF used in primary analyses (see Table 2) was AF present on two separate occasions 6-36 months apart without any documented sinus rhythm.

† Models 1 & 2 not shown. Model 3: Adjusted for age, sex, all risk factors shown in the table, and baseline coronary heart disease, valvular heart disease, heart failure, and prior stroke.

‡ The HR per 5-kg/m<sup>2</sup> increment of continuous BMI was 1.21 (95% CI: 1.09, 1.34).

§ The HR per 5-kg/m<sup>2</sup> increment of continuous BMI was 1.16 (95% CI: 1.05, 1.27).

|| The HR per 5-kg/m<sup>2</sup> increment of continuous BMI was 1.09 (95% CI: 0.99, 1.20).

**eTable 4. Hazard ratios of recurrent AF**

| Risk factor                               | Events | Person-years | Model 1*<br>HR (95% CI) | Model 2†<br>HR (95% CI) | Model 3‡<br>HR (95% CI) |
|-------------------------------------------|--------|--------------|-------------------------|-------------------------|-------------------------|
| Overall                                   | 1,204  | 2,827        | —                       | —                       | —                       |
| Age, per 10 y                             | —      | —            | 1.07 (1.01, 1.13)       | 1.09 (1.02, 1.16)       | 1.09 (1.03, 1.16)       |
| Female                                    | 484    | 1,412        | 1.00 (reference)        | 1.00 (reference)        | 1.00 (reference)        |
| Male                                      | 540    | 1,415        | 1.12 (0.99, 1.27)       | 1.14 (1.00, 1.29)       | 1.16 (1.02, 1.32)       |
| Body mass index (kg/m <sup>2</sup> )§     |        |              |                         |                         |                         |
| 18.5 – 24.9 (normal)                      | 245    | 666          | 1.00 (reference)        | 1.00 (reference)        | 1.00 (reference)        |
| 25.0 – 29.9 (overweight)                  | 376    | 998          | 1.10 (0.94, 1.30)       | 1.13 (0.96, 1.33)       | 1.14 (0.97, 1.35)       |
| 30.0 – 34.9 (obese 1)                     | 215    | 657          | 1.01 (0.84, 1.22)       | 1.07 (0.88, 1.29)       | 1.08 (0.89, 1.30)       |
| 35.0 – 39.9 (obese 2)                     | 97     | 251          | 1.23 (0.97, 1.56)       | 1.29 (1.01, 1.64)       | 1.32 (1.03, 1.69)       |
| ≥ 40.0 (obese 3)                          | 91     | 254          | 1.25 (0.98, 1.61)       | 1.34 (1.04, 1.74)       | 1.34 (1.04, 1.74)       |
| Diabetes:                                 |        |              |                         |                         |                         |
| No                                        | 872    | 2,358        | 1.00 (reference)        | 1.00 (reference)        | 1.00 (reference)        |
| Yes                                       | 152    | 469          | 0.92 (0.78, 1.10)       | 0.88 (0.74, 1.06)       | 0.88 (0.73, 1.06)       |
| Hypertension:                             |        |              |                         |                         |                         |
| No                                        | 475    | 1,333        | 1.00 (reference)        | 1.00 (reference)        | 1.00 (reference)        |
| Yes                                       | 549    | 1,494        | 1.00 (0.88, 1.14)       | 1.01 (0.89, 1.15)       | 1.02 (0.89, 1.16)       |
| Systolic blood pressure,<br>per 10 mm Hg  | —      | —            | 0.97 (0.94, 1.00)       | 0.97 (0.93, 1.01)       | 0.97 (0.93, 1.01)       |
| Diastolic blood pressure,<br>per 10 mm Hg | —      | —            | 0.96 (0.90, 1.01)       | 0.97 (0.91, 1.04)       | 0.98 (0.91, 1.05)       |

\* Model 1: Adjusted for age and sex.

† Model 2: Adjusted for age, sex, and all risk factors shown in the table.

‡ Model 3: Adjusted for age, sex, all risk factors shown in the table, and baseline coronary heart disease, valvular heart disease, heart failure, and prior stroke.

§ The HRs per 5-kg/m<sup>2</sup> increment of continuous BMI were 1.04 (95% CI: 1.00, 1.09) in model 1; 1.06 (95% CI: 1.01, 1.11) in model 2; and 1.06 (95% CI: 1.01, 1.11) in model 3.

eFigure 1.

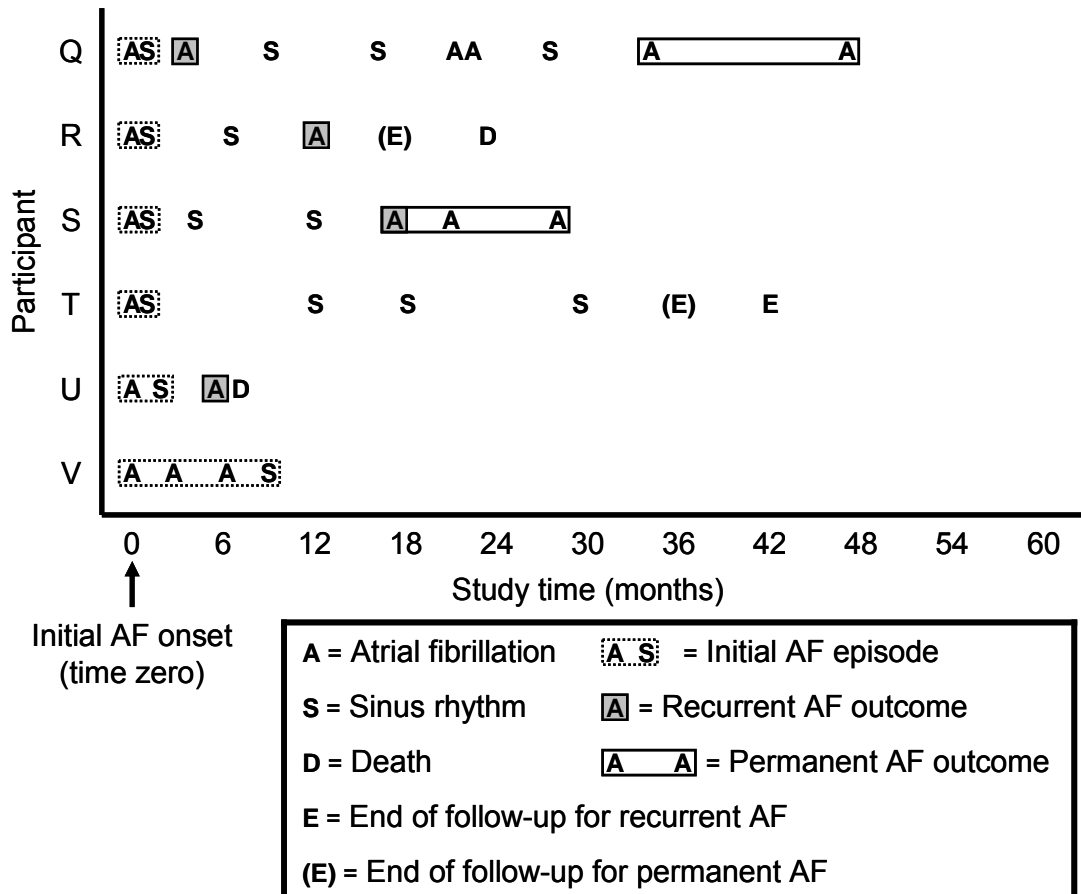

Examples of participant timelines showing recurrent and permanent AF outcomes:

**Participant Q:** Sinus rhythm was observed one day after initial AF onset, indicating the initial AF episode had terminated, and the participant entered follow-up for outcomes. Recurrent AF was observed in month 4. Permanent AF was observed in months 34-47, where AF was present on two separate occasions at least six months apart without any documented sinus rhythm.

**Participant R:** Sinus rhythm was observed one day after initial AF onset. Recurrent AF was observed in month 12. Permanent AF was not observed. Follow-up for permanent AF ended in month 17, six months prior to the participant's death in month 23.

**Participant S:** Sinus rhythm was observed one day after initial AF onset. Recurrent AF was observed in month 18. Permanent AF was observed in months 18-28.

**Participant T:** Sinus rhythm was observed one week after initial AF onset. Recurrent AF was not observed. Follow-up for recurrent AF ended in month 42, when the study ended. Permanent AF was not observed. Follow-up for permanent AF ended in month 36, six months prior to the study end in month 42.

**Participant U:** Sinus rhythm was observed two months after initial AF onset. Recurrent AF was observed in month 6. The participant died in month 7 and was therefore excluded from the analysis of permanent AF because less than six months of follow-up time were available after termination of the initial AF episode.

**Participant V:** Sinus rhythm was observed nine months after initial AF onset. Because the initial AF episode did not terminate within six months the participant was excluded from the study and did not enter follow-up for outcomes.
